# Supplementary material
Source: Springer Nature journal article supplement (https://www.springermedizin.de/resource/supplementary/13256_2011_1724_MOESM7_ESM.pdf/9648294)

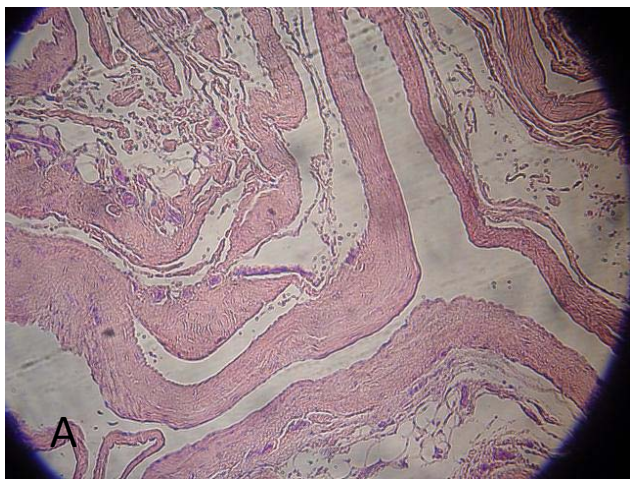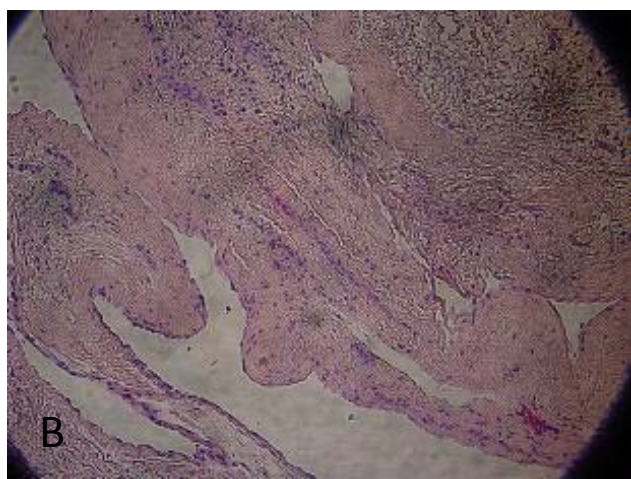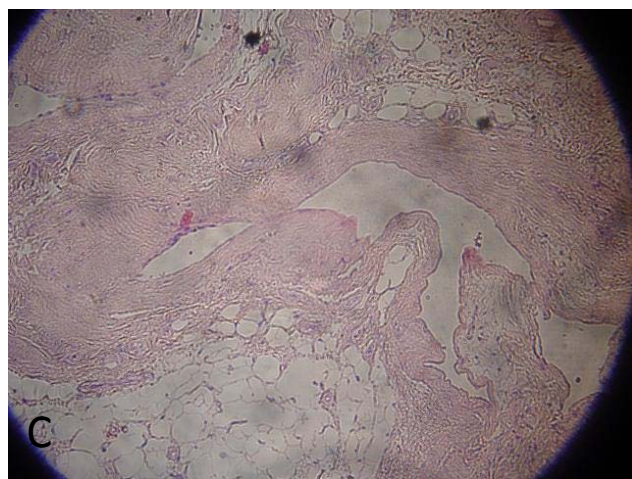

Supplement: MOESM7 [file 9648294]
